# Supplementary material
Source: publisher figshare collection journal article supplement (https://acs.figshare.com/ndownloader/files/5922195)
Supplement: Supplementary file 1 [file 5922195]

Supplemental Information for

## **Dynamic Behavior at the Interface between Lithium Cobalt Oxide and an Organic Electrolyte Monitored by Neutron Reflectivity Measurements**

Taketoshi Minato,<sup>†</sup> Hiroyuki Kawaura,<sup>†</sup> Masaaki Hirayama,<sup>§</sup> Sou Taminato,<sup>§</sup> Kota Suzuki,<sup>§</sup> Norifumi L. Yamada,<sup>¶</sup> Hidetaka Sugaya,<sup>†</sup> Kentaro Yamamoto,<sup>‡</sup> Koji Nakanishi,<sup>†</sup> Yuki Orihara,<sup>‡</sup> Hajime Tanida,<sup>†</sup> Ryoji Kanno,<sup>§</sup> Hajime Arai,<sup>†</sup> Yoshiharu Uchimoto<sup>‡</sup> and Zempachi Ogumi<sup>†</sup>

<sup>†</sup> Office of Society-Academia Collaboration for Innovation, Kyoto University, Gokasho, Uji, Kyoto 611-0011, Japan

<sup>§</sup> Department of Electronic Chemistry, Interdisciplinary Graduate School of Science and Engineering, Tokyo Institute of Technology, 4259 Nagatsuta, Midori-ku, Yokohama 226-8502, Japan

<sup>¶</sup> High Energy Accelerator Research Organization (KEK), 2-4 Shirane Shirakata, Tokai-mura, Nakagun, Ibaraki 319-1195, Japan

<sup>‡</sup> Graduate School of Human and Environmental Studies, Kyoto University, Sakyo-ku, Kyoto 606-8501, Japan

Table S1. Calculated values of scattering length density (SLD) of species formed by reactions of a LiCoO<sub>2</sub> surface and an electrolyte (1 M LiClO<sub>4</sub> in a vol. 1:2 solution of deuterated ethylene carbonate (EC):dimethyl carbonate (DMC)).

| Species                                                     | Calculated SLD / nm <sup>-2</sup> |
|-------------------------------------------------------------|-----------------------------------|
| C <sub>30</sub> D <sub>62</sub> O <sub>16</sub> (PEO)       | 7.51 × 10 <sup>-5</sup>           |
| C <sub>300</sub> D <sub>602</sub> O <sub>151</sub> (PEO)    | 7.51 × 10 <sup>-5</sup>           |
| C <sub>3000</sub> D <sub>6002</sub> O <sub>1501</sub> (PEO) | 7.51 × 10 <sup>-5</sup>           |
| Li <sub>2</sub> CO <sub>3</sub>                             | 3.48 × 10 <sup>-4</sup>           |
| LiOD                                                        | 3.88 × 10 <sup>-4</sup>           |
| LiCl                                                        | 2.26 × 10 <sup>-4</sup>           |
| LiOCO <sub>2</sub> CD <sub>3</sub>                          | 4.74 × 10 <sup>-4</sup>           |
| (LiCO <sub>2</sub> CD <sub>2</sub> ) <sub>2</sub>           | 4.45 × 10 <sup>-4</sup>           |
